# Supplementary material
Source: PubMed Central journal article supplement (PMC2932551)
Supplement: Supp_Table.pdf [file Supp_Table.pdf]

SUPPLEMENTAL TABLE 1. POSITIONAL SEQUENCE VARIABILITY SCORE<sup>a</sup>

| A          | B    | C    | D   | E    | F   | G   | H    | I    | J    | K    | L    | M    | N    | O    | P    | Q    | R    | S    | T    | U    | V     | W         | X     | Y       | Z         | AA     | AB      | AC          |
|------------|------|------|-----|------|-----|-----|------|------|------|------|------|------|------|------|------|------|------|------|------|------|-------|-----------|-------|---------|-----------|--------|---------|-------------|
| Amino acid | I    | F    | L   | V    | M   | W   | C    | Y    | A    | H    | G    | T    | P    | S    | R    | N    | Q    | E    | D    | K    | I,L,V | Consensus | Index | Max (N) | Total (P) | Var    | N Var   | Totals      |
| 1          | 0    | 0    | 0   | 0    | 0   | 1   | 5999 | 3    | 0    | 0    | 0    | 0    | 0    | 2    | 5    | 0    | 0    | 0    | 0    | 0    | 0     | C         |       | 5999    | 6010      | 0.18%  | 0.31%   |             |
| 2          | 787  | 4    | 5   | 77   | 40  | 0   | 0    | 1    | 71   | 0    | 0    | 4901 | 9    | 85   | 3    | 2    | 1    | 17   | 0    | 7    | 869   | T         |       | 4901    | 6010      | 18.45% | 30.95%  |             |
| 3          | 4    | 0    | 0   | 0    | 0   | 0   | 0    | 0    | 0    | 0    | 7    | 9    | 0    | 7    | 5971 | 0    | 0    | 0    | 0    | 12   | 4     | R         |       | 5971    | 6010      | 0.65%  | 1.09%   |             |
| 4          | 4    | 9    | 35  | 8    | 0   | 0   | 0    | 2    | 2    | 17   | 0    | 15   | 5906 | 10   | 2    | 0    | 0    | 0    | 0    | 0    | 47    | P         |       | 5906    | 6010      | 1.73%  | 2.90%   |             |
| 5          | 8    | 39   | 1   | 2    | 0   | 0   | 0    | 72   | 26   | 72   | 850  | 22   | 2    | 973  | 1    | 3923 | 3    | 0    | 13   | 3    | 11    | N         |       | 3923    | 6010      | 34.73% | 58.25%  |             |
| 6          | 13   | 0    | 0   | 0    | 0   | 0   | 0    | 17   | 0    | 6    | 6    | 27   | 0    | 25   | 7    | 5838 | 3    | 10   | 29   | 29   | 13    | N         |       | 5838    | 6010      | 2.86%  | 4.80%   | Stem        |
| 7          | 17   | 2    | 0   | 0    | 0   | 0   | 0    | 43   | 1    | 11   | 0    | 23   | 2    | 10   | 2    | 5856 | 0    | 0    | 7    | 36   | 17    | N         |       | 5856    | 6010      | 2.56%  | 4.30%   | 19.91%      |
| 8          | 84   | 0    | 3   | 11   | 4   | 0   | 0    | 0    | 7    | 0    | 0    | 5810 | 4    | 2    | 26   | 1    | 6    | 4    | 0    | 48   | 98    | T         | 303   | 5810    | 6010      | 3.33%  | 5.58%   |             |
| 9          | 62   | 2    | 3   | 2    | 6   | 0   | 0    | 1    | 5    | 0    | 22   | 9    | 1    | 79   | 5739 | 3    | 6    | 7    | 0    | 63   | 67    | R         | 304   | 5739    | 6010      | 4.51%  | 7.56%   | Hydrophilic |
| 10         | 14   | 0    | 0   | 4    | 2   | 2   | 0    | 0    | 1    | 2    | 10   | 936  | 3    | 5    | 631  | 15   | 168  | 191  | 2    | 4024 | 18    | K         | 305   | 4024    | 6010      | 33.04% | 55.43%  | 65.78%      |
| 11         | 3    | 0    | 0   | 1    | 0   | 1   | 0    | 0    | 1    | 5    | 805  | 2    | 1    | 4896 | 250  | 13   | 6    | 1    | 10   | 15   | 4     | S         | 306   | 4896    | 6010      | 18.54% | 31.09%  |             |
| 12         | 4434 | 8    | 37  | 1043 | 379 | 5   | 0    | 8    | 4    | 4    | 2    | 66   | 0    | 4    | 11   | 1    | 1    | 2    | 0    | 1    | 5514  | I         | 307   | 5514    | 6010      | 8.25%  | 13.84%  | Hydrophobic |
| 13         | 16   | 2    | 3   | 0    | 3   | 2   | 1    | 45   | 20   | 1853 | 73   | 531  | 438  | 252  | 2427 | 283  | 53   | 0    | 0    | 8    | 19    | R         | 308   | 2427    | 6010      | 59.62% | 100.00% | 15.55%      |
| 14         | 4998 | 89   | 412 | 61   | 395 | 0   | 0    | 1    | 3    | 14   | 0    | 20   | 2    | 6    | 4    | 0    | 1    | 0    | 0    | 4    | 5471  | I         | 309   | 5471    | 6010      | 8.97%  | 15.04%  |             |
| 15         | 23   | 0    | 1   | 4    | 0   | 0   | 0    | 0    | 86   | 1    | 5862 | 2    | 0    | 5    | 19   | 0    | 6    | 0    | 0    | 1    | 28    | G         | 312   | 5862    | 6010      | 2.46%  | 4.13%   | Turn        |
| 16         | 0    | 9    | 38  | 0    | 2   | 44  | 0    | 0    | 4    | 0    | 27   | 4    | 5823 | 8    | 3    | 0    | 48   | 0    | 0    | 0    | 38    | P         | 313   | 5823    | 6010      | 3.11%  | 5.22%   | 20.40%      |
| 17         | 0    | 2    | 4   | 3    | 1   | 4   | 1    | 0    | 0    | 0    | 5945 | 0    | 17   | 0    | 21   | 0    | 6    | 4    | 0    | 2    | 7     | G         | 314   | 5945    | 6010      | 1.08%  | 1.81%   |             |
| 18         | 3    | 0    | 3   | 0    | 1   | 0   | 0    | 4    | 14   | 31   | 98   | 4    | 5    | 94   | 2069 | 0    | 3486 | 4    | 0    | 194  | 6     | Q         | 315   | 3486    | 6010      | 42.00% | 70.44%  |             |
| 19         | 31   | 0    | 3   | 740  | 9   | 0   | 0    | 6    | 3173 | 1    | 1    | 1913 | 1    | 76   | 27   | 2    | 11   | 6    | 0    | 10   | 774   | A         | 316   | 3173    | 6010      | 47.20% | 79.18%  |             |
| 20         | 110  | 5263 | 219 | 75   | 14  | 248 | 0    | 45   | 21   | 1    | 0    | 3    | 1    | 7    | 2    | 0    | 0    | 1    | 0    | 0    | 404   | F         | 317   | 5263    | 6010      | 12.43% | 20.85%  |             |
| 21         | 13   | 277  | 13  | 20   | 1   | 5   | 4    | 5563 | 1    | 90   | 0    | 1    | 0    | 4    | 11   | 3    | 1    | 0    | 3    | 0    | 46    | Y         | 318   | 5563    | 6010      | 7.44%  | 12.48%  |             |
| 22         | 7    | 2    | 3   | 14   | 1   | 0   | 1    | 26   | 4116 | 5    | 21   | 1247 | 5    | 15   | 479  | 0    | 10   | 3    | 0    | 55   | 24    | A         | 319   | 4116    | 6010      | 31.51% | 52.86%  |             |
| 23         | 38   | 0    | 2   | 3    | 26  | 0   | 0    | 1    | 149  | 17   | 1    | 5613 | 13   | 30   | 74   | 27   | 4    | 3    | 0    | 9    | 43    | T         | 320   | 5613    | 6010      | 6.61%  | 11.08%  |             |
| 24         | 1    | 0    | 0   | 0    | 0   | 0   | 0    | 2    | 4    | 6    | 5342 | 44   | 0    | 11   | 65   | 160  | 1    | 151  | 143  | 80   | 1     | G         |       | 5342    | 6010      | 11.11% | 18.64%  |             |
| 25         | 6    | 0    | 3   | 10   | 4   | 0   | 0    | 5    | 434  | 12   | 317  | 29   | 5    | 52   | 150  | 121  | 368  | 1360 | 2960 | 174  | 19    | D         |       | 2960    | 6010      | 50.75% | 85.12%  |             |
| 26         | 5523 | 0    | 7   | 443  | 9   | 0   | 0    | 1    | 1    | 0    | 3    | 12   | 1    | 1    | 3    | 0    | 1    | 1    | 1    | 3    | 5973  | I         |       | 5973    | 6010      | 0.62%  | 1.03%   |             |
| 27         | 5391 | 2    | 14  | 180  | 13  | 0   | 0    | 1    | 4    | 0    | 5    | 357  | 1    | 6    | 6    | 4    | 5    | 4    | 0    | 17   | 5585  | I         |       | 5585    | 6010      | 7.07%  | 11.86%  |             |
| 28         | 0    | 0    | 0   | 1    | 0   | 1   | 0    | 0    | 0    | 0    | 5948 | 2    | 0    | 2    | 27   | 1    | 0    | 18   | 1    | 9    | 1     | G         |       | 5948    | 6010      | 1.03%  | 1.73%   |             |
| 29         | 5    | 2    | 0   | 5    | 0   | 0   | 0    | 3    | 3    | 3    | 16   | 9    | 1    | 8    | 3    | 922  | 4    | 34   | 4967 | 25   | 10    | D         |       | 4967    | 6010      | 17.35% | 29.11%  |             |
| 30         | 5898 | 0    | 10  | 27   | 10  | 0   | 0    | 1    | 0    | 0    | 0    | 28   | 24   | 0    | 2    | 5    | 0    | 0    | 1    | 4    | 5935  | I         |       | 5935    | 6010      | 2.09%  | 2.09%   |             |
| 31         | 6    | 0    | 1   | 0    | 0   | 0   | 0    | 0    | 0    | 0    | 13   | 8    | 0    | 9    | 5898 | 0    | 0    | 2    | 0    | 73   | 7     | R         |       | 5898    | 6010      | 1.86%  | 3.13%   |             |
| 32         | 4    | 0    | 16  | 0    | 0   | 2   | 0    | 3    | 21   | 23   | 2    | 2    | 2    | 10   | 210  | 12   | 4336 | 114  | 4    | 1249 | 20    | Q         |       | 4336    | 6010      | 27.85% | 46.72%  |             |
| 33         | 0    | 0    | 0   | 5    | 0   | 0   | 0    | 0    | 5980 | 0    | 2    | 8    | 7    | 7    | 0    | 0    | 1    | 0    | 0    | 0    | 5     | A         |       | 5980    | 6010      | 0.50%  | 0.84%   |             |
| 34         | 1    | 56   | 3   | 0    | 0   | 1   | 3    | 1542 | 1    | 4333 | 0    | 0    | 3    | 14   | 11   | 9    | 28   | 0    | 5    | 0    | 4     | H         |       | 4333    | 6010      | 27.90% | 46.80%  |             |
| 35         | 0    | 0    | 0   | 0    | 0   | 0   | 5996 | 4    | 0    | 0    | 2    | 0    | 0    | 4    | 4    | 0    | 0    | 0    | 0    | 0    | 0     | C         |       | 5996    | 6010      | 0.23%  | 0.39%   |             |

<sup>a</sup>Columns B–U count the total number of times a given amino acid occurs at that V3 position in the group of 6010 sequences used to create this table. Column V contains the sum of columns B, D, and E. Column X (Index) indicates the amino acid index number assigned in the PDB (index numbers are shown only for the loop crown region). Columns Y and Z are used in calculating the variability (*n* and *p*; see Materials and Methods). Column Z contains the value of the highest occurring amino acid (or acids, if column V contains the maximum) from the row. The nonnormalized positional variability score (column AA) is calculated using the equation  $1 - (n/p)$ . The normalized positional variability score (column AB) is calculated by multiplying column AA by a coefficient that fixes the most variable position at 100%. In this table the most variable position is found at the amino acid index number 308, and the resulting coefficient ~ 1.67.
